# Supplementary material for: Phylogenetic Analysis of Pyruvate-Ferredoxin Oxidoreductase, a Redox Enzyme Involved in the Activation of Nitro-Based Prodrugs in Bacteria and Protozoa
Source: Preprints.org preprint supplement (doi:10.20944/preprints202311.1649.v2), 2024-03-01
Supplement: Supplementary file 3 [file supplementary]

**Table S1**

**Gene and accession numbers of the redox enzymes and control proteins from the UniProt™ Protein Database**

| **Parasite** | **Enzyme** | **Gene number** | **Accession number** | **Redox drug** |
| --- | --- | --- | --- | --- |
| *G. duodenalis* | PFOR | Q24982 | AAA74894.1 | Metronidazole |
| *E. histolytica* | PFOR | N9TJX2 | ENY63830.1 | Metronidazole |
| *C. parvum* | PFOR | A1DRF1 | ABK91849.1 | Nitazoxanide |

| Parasite | Control protein1 | Gene/Accession number | Control protein 2 | Gene/Accession number | Control protein 3 | Gene/Accession number |
| --- | --- | --- | --- | --- | --- | --- |
| *G. duodenalis* | GAPDH | **P53429** AAB18421.1 | TUB | A8BPC0 EDO78046.1 | **RPB1** | **Q8MUU2** AAM77743.1 |
| *E. histolytica* | GAPDH | C4LVR9 BAN37492.1 | TUB | P31017 AAA57315.1 | **RPB1** | Q6IUR3 AAT40981.1 |
| *C. parvum* | GAPDH | Q7YYQ9 BAJ77164.1 | TUB | Q9UAC3 AAD20239.1 | **RPB1** | **A0A7G2HJ78 CAD98371.1** |

Table S2

List of protozoa showing how their lifecycle supports the horizontal acquisition of PFOR from bacteria based on the proximity hypothesis.


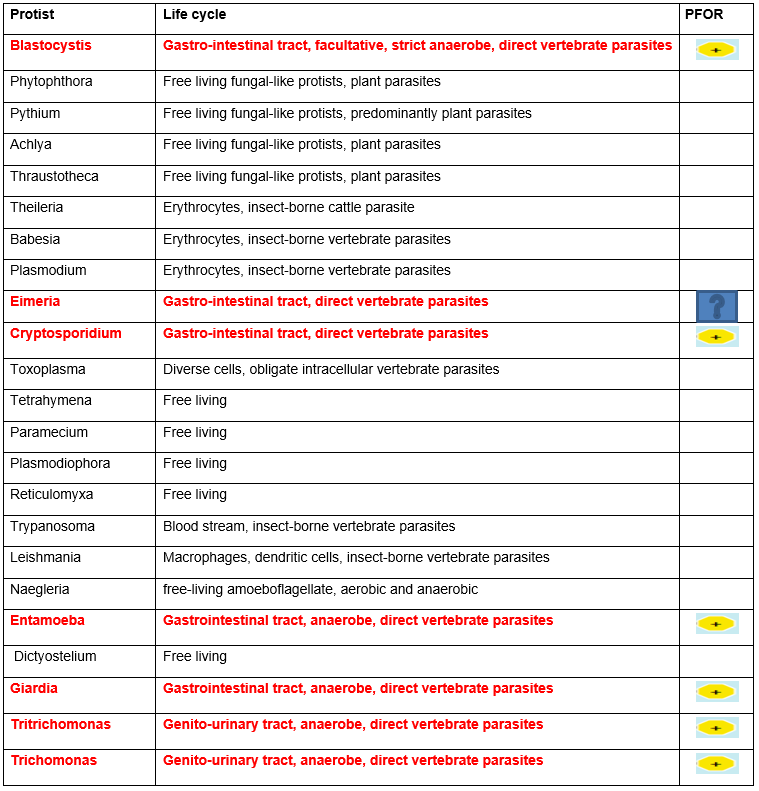


Straminopiles Alveolates Rhizaria

Excavates Amoebozoa Metamonads
